# Supplementary material for: Improving the Methodology for Determining the Biomass/Coal Co-Combustion Ratio: Predictive Modeling of the 14C Activity of Pure Biomass
Source: MDPI journal article supplement (doi:10.3390/en17040942), 2024-02-17
Supplement: s1 [file s1]

# Improving the Methodology for Determining the Biomass/Coal Co-Combustion Ratio: Predictive Modeling of the $^{14}\text{C}$ Activity of Pure Biomass

Yinchen Wang, Zhongyang Luo \*, Chunjiang Yu, Sheng Wang, Xiaohuan Wang and Peiliang Zhu

**Figure S1.** The relationship between atmospheric  $^{14}\text{CO}_2$  activity and several local economic indicators of several cities in 2010.

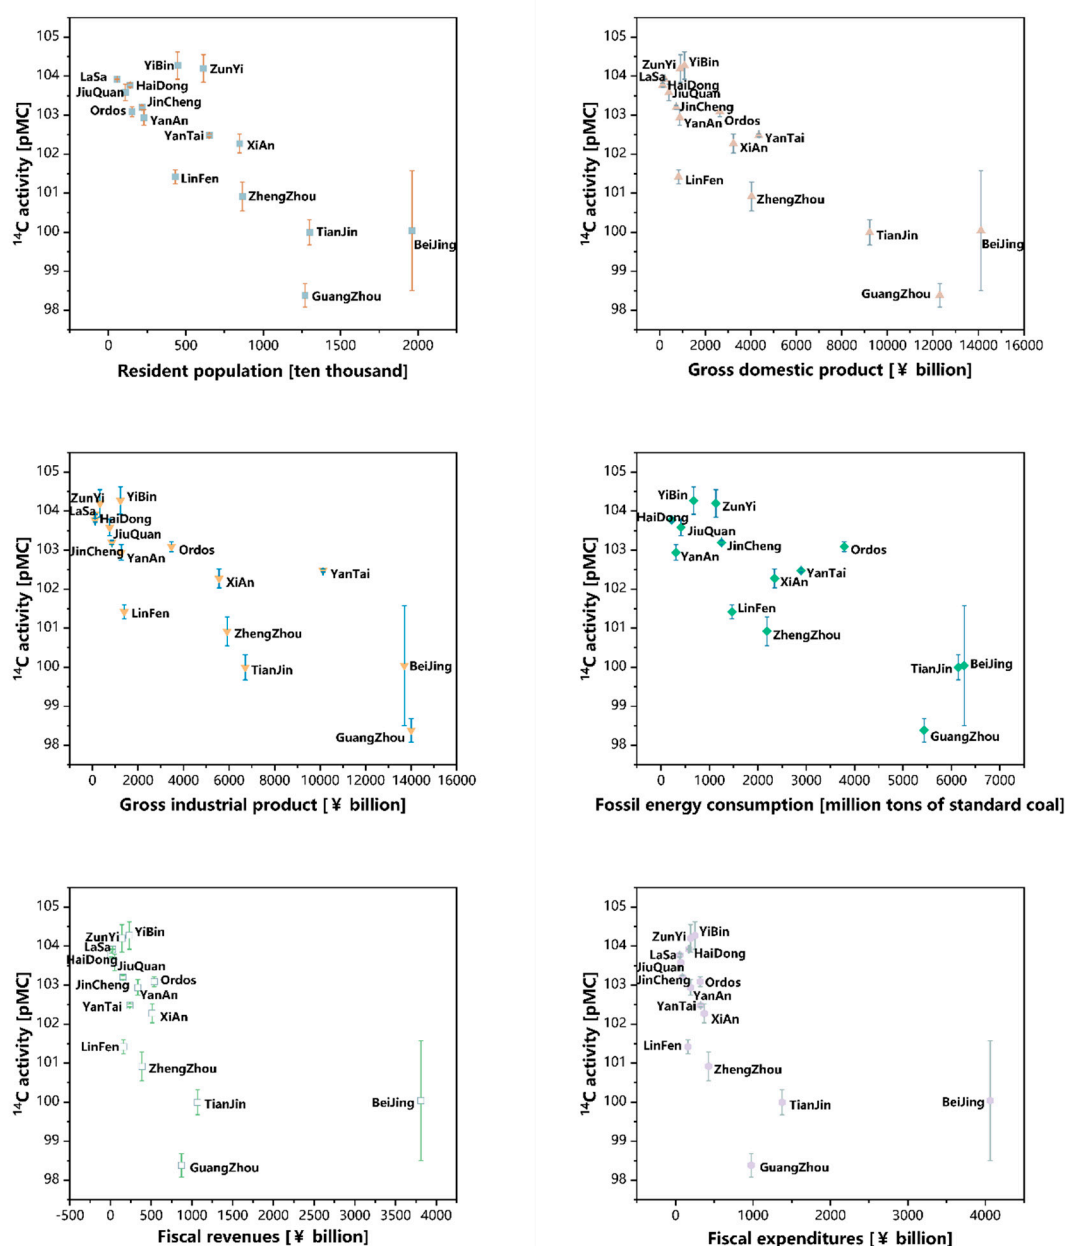

**Figure S2.** The relationship between atmospheric  $^{14}\text{C}$  activity and several local economic indicators of several cities in 2014.

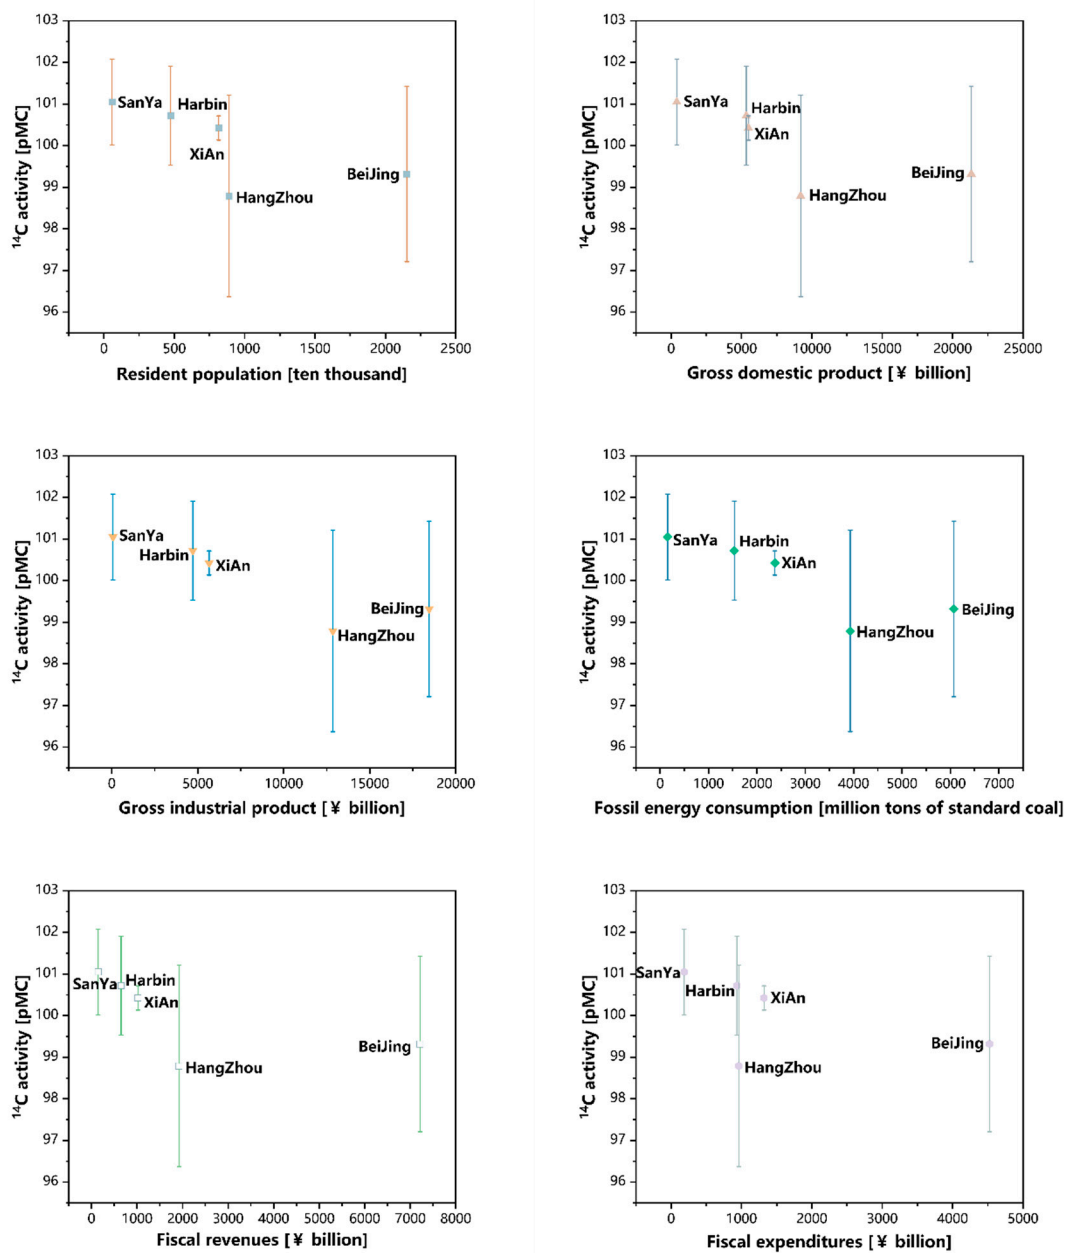

**Figure S3.** The relationship between atmospheric  $^{14}\text{CO}_2$  activity and several local economic indicators of several districts of Beijing in 2009.

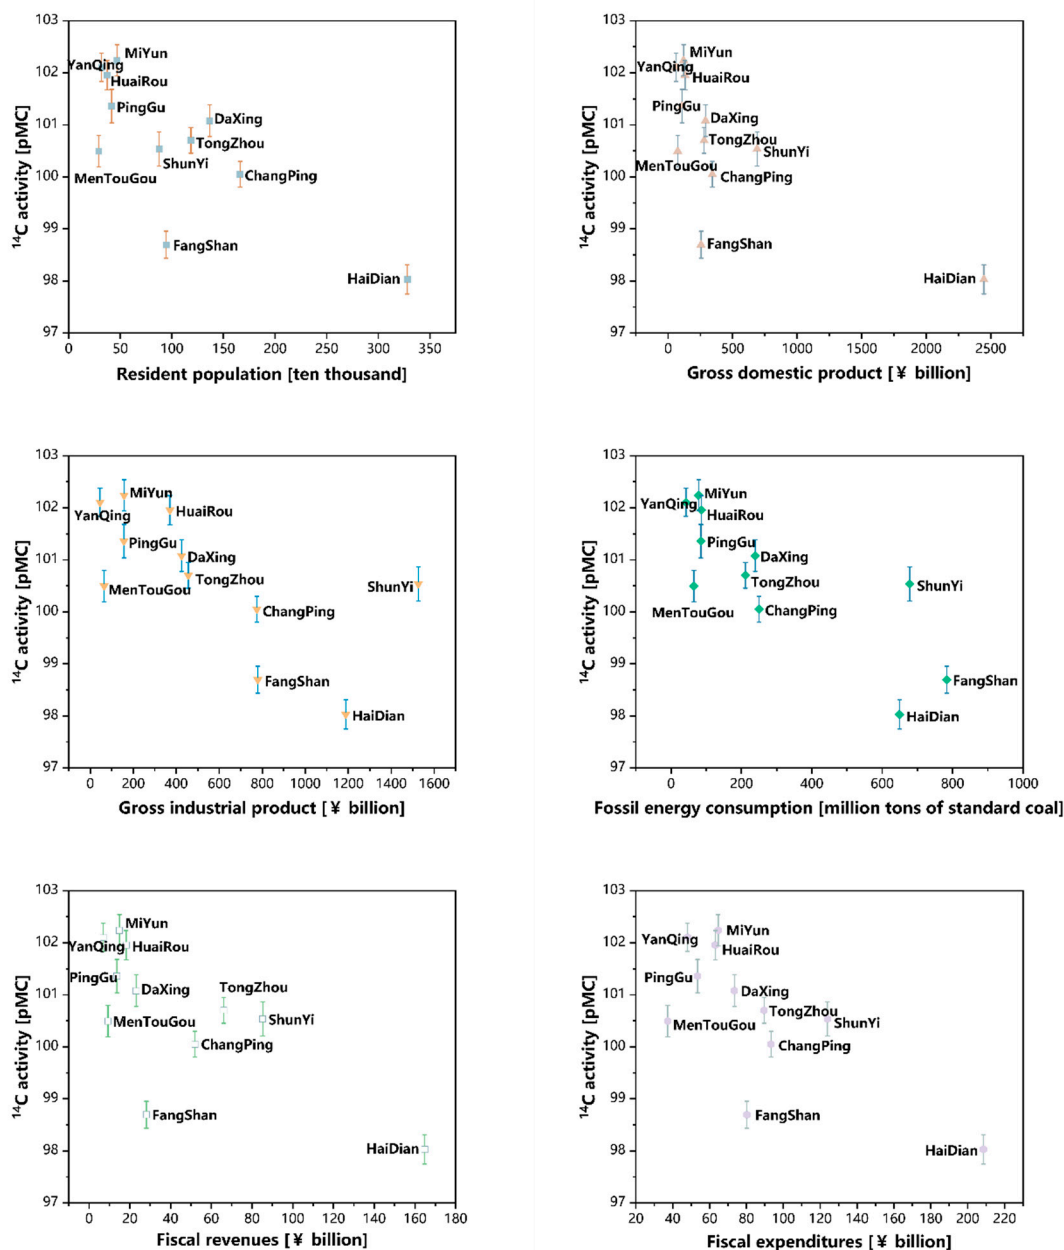

**Table S1.** The commonly used plant growth function models.

| Functional Model | Function Formula                                     |
|------------------|------------------------------------------------------|
| Chapman-Richard  | $V(t) = a \times [1 - b \times \exp(-c \times t)]^d$ |
| Logistic         | $V(t) = \frac{a}{1 + \exp(b - c \times t)}$          |
| Mitscherlich     | $V(t) = a \times [1 - \exp(-b \times t)]$            |
| Korf             | $V(t) = a \times \exp(-b \times t - c)$              |
| Gomportz         | $V(t) = a \times \exp[-b \times \exp(-c \times t)]$  |
| Schumacher       | $V(t) = a \times \exp(-b / t)$                       |
| Gauss            | $V(t) = a \times [1 - b \times \exp(-c \times t^2)]$ |
